# Supplementary material
Source: PubMed Central journal article supplement (PMC7246081)
Supplement: NIHMS1023300-supplement-supplement.pdf [file NIHMS1023300-supplement-supplement.pdf]

**Supplemental Information**

**ARv7 Represses Tumor-Suppressor Genes  
in Castration-Resistant Prostate Cancer**

**Laura Cato, Jonas de Tribolet-Hardy, Irene Lee, Jaice T. Rottenberg, Ilsa Coleman, Diana Melchers, René Houtman, Tengfei Xiao, Wei Li, Takuma Uo, Shihua Sun, Nane C. Kuznik, Bettina Göppert, Fatma Ozgun, Martin E. van Royen, Adriaan B. Houtsmuller, Raga Vadhi, Prakash K. Rao, Lewyn Li, Steven P. Balk, Robert B. Den, Bruce J. Trock, R. Jeffrey Karnes, Robert B. Jenkins, Eric A. Klein, Elai Davicioni, Friederike J. Gruhl, Henry W. Long, X. Shirley Liu, Andrew C.B. Cato, Nathan A. Lack, Peter S. Nelson, Stephen R. Plymate, Anna C. Groner, and Myles Brown**

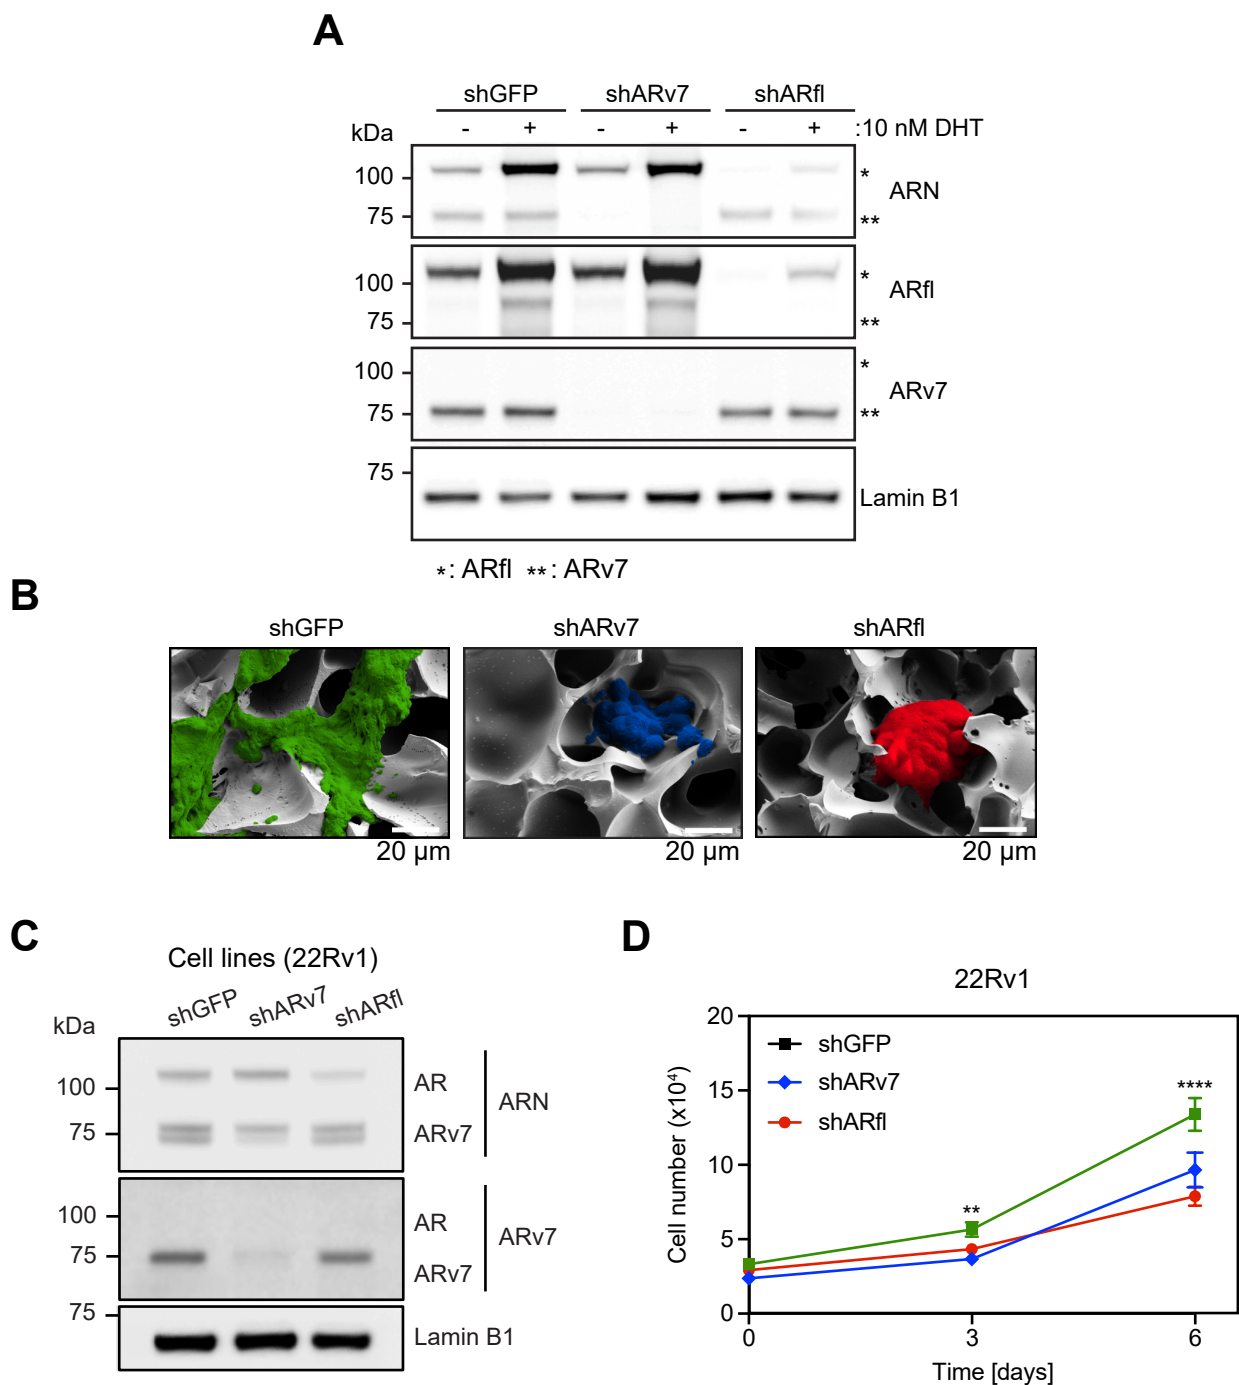

**Figure S1 (related to Figure 1). Efficiency of ARv7 and ARfl knockdown in LNCaP95 and 22Rv1 cells and its effect on 22Rv1 cell growth**

**A.** Western blot of nuclear lysates of LNCaP95 shGFP, shARv7 and shARfl cells induced with dox for 3 days and treatment with vehicle (-) or 10 nM DHT (+) for 4 hr. AR levels were detected (and specificity of the respective antibodies confirmed) using antibodies against the AR N-terminus (ARN; which recognized both ARfl and ARv7) or antibodies specific for ARfl or ARv7. Equal protein loading was confirmed with Lamin B1. **B.** Representative scanning electron microscope images of LNCaP95 cell lines grown in 3D/PEGda cryogels and in the presence of dox (as in Figure 1 C). Images were acquired after 7 days of growth. Scale bar = 20  $\mu$ m. **C.** Western blot of nuclear lysates from 22Rv1 cells with dox-inducible sh constructs against GFP (shGFP), ARv7 (shARv7) or ARfl (shARfl). Cells were hormone starved and treated with dox and vehicle (ETOH) for 6-days. Proteins were detected as described in A, using the ARN and ARv7 antibodies. **D.** Cell growth assay of 22Rv1 cells, as in C, grown over a 6 day period in the presence of dox and vehicle (ETOH). Data is the mean of 3 independent experiments  $\pm$  SD. p values were calculated using standard t test; \*\*:  $p \leq 0.01$ ; \*\*\*\*:  $p \leq 0.0001$ .

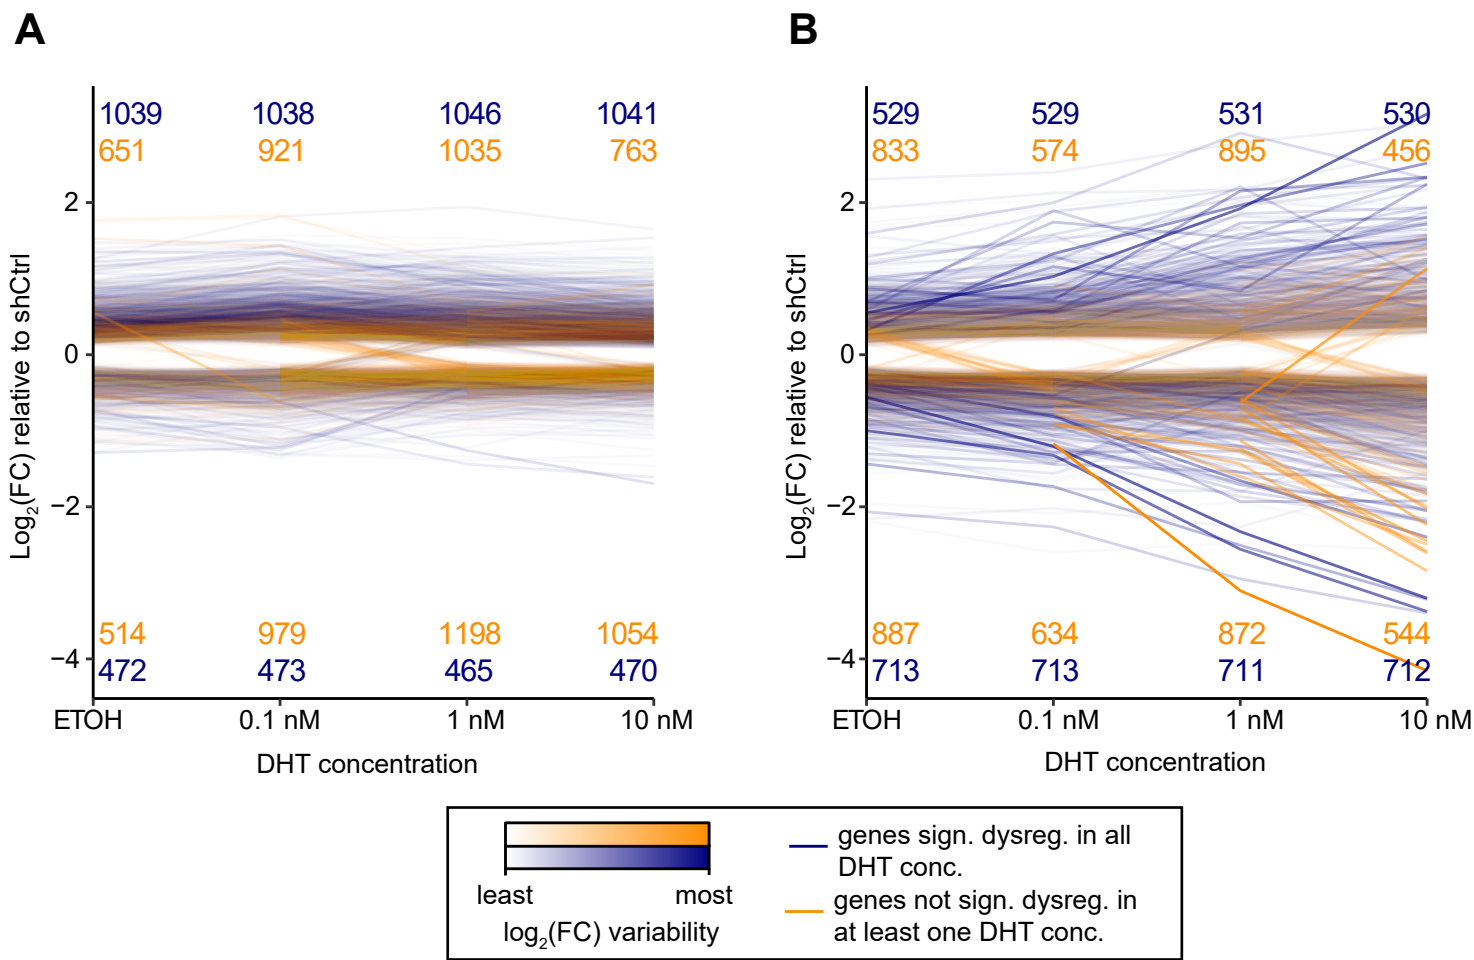

**Figure S2 (related to Figure 2). DHT dose-dependent responses in shARv7 or shARf1 LNCaP95 cells**

**A, B.** Lineplots of differentially-expressed genes in the shARv7 (A) or shARf1 (B) LNCaP95 cell lines, compared to the shGFP control. Cells were grown in the presence of dox for 3 days, with different doses of DHT (0.1, 1, and 10 nM) or with vehicle (ETOH) for 24 hr. Genes significantly dysregulated relative to the control (shGFP) for all DHT concentrations are drawn in blue. Genes with missing values are drawn in orange. The opacity of the lines is proportional to their variance over the four concentrations: i.e. higher standard deviation equals higher opacity. The numbers indicate the number of points with a positive (top) or negative log<sub>2</sub> fold change (log<sub>2</sub>FC) (bottom) for a given DHT concentration.

**Table S1 (related to Figure 2). Hallmark Gene Set Enrichment Analysis of ARfl- and ARv7-regulated genes**

| NAME                       | NES    | NOM p val | CELL LINE        |
|----------------------------|--------|-----------|------------------|
| E2F TARGETS                | 1.875  | 0.0000    | LN95 shARv7 ETOH |
| G2M CHECKPOINT             | 1.862  | 0.0000    | LN95 shARv7 ETOH |
| ESTROGEN RESPONSE EARLY    | 1.752  | 0.0000    | LN95 shARv7 ETOH |
| ESTROGEN RESPONSE LATE     | 1.720  | 0.0000    | LN95 shARv7 ETOH |
| IL2 STAT5 SIGNALING        | 1.695  | 0.0000    | LN95 shARv7 ETOH |
| MITOTIC SPINDLE            | 1.605  | 0.0000    | LN95 shARv7 ETOH |
| EMT                        | 1.488  | 0.0000    | LN95 shARv7 ETOH |
| ADIPOGENESIS               | 1.519  | 0.0015    | LN95 shARv7 ETOH |
| NOTCH SIGNALING            | 1.651  | 0.0018    | LN95 shARv7 ETOH |
| UV RESPONSE UP             | 1.446  | 0.0030    | LN95 shARv7 ETOH |
| UV RESPONSE DN             | 1.498  | 0.0032    | LN95 shARv7 ETOH |
| INFLAMMATORY RESPONSE      | 1.507  | 0.0046    | LN95 shARv7 ETOH |
| APICAL JUNCTION            | 1.416  | 0.0046    | LN95 shARv7 ETOH |
| APICAL SURFACE             | 1.757  | 0.0054    | LN95 shARv7 ETOH |
| IL6 JAK STAT3 SIGNALING    | 1.656  | 0.0086    | LN95 shARv7 ETOH |
| PEROXISOME                 | 1.453  | 0.0100    | LN95 shARv7 ETOH |
| OXIDATIVE PHOSPHORYLATION  | 1.359  | 0.0119    | LN95 shARv7 ETOH |
| ANGIOGENESIS               | 1.570  | 0.0124    | LN95 shARv7 ETOH |
| FATTY ACID METABOLISM      | 1.370  | 0.0216    | LN95 shARv7 ETOH |
| HEDGEHOG SIGNALING         | 1.536  | 0.0295    | LN95 shARv7 ETOH |
| BILE ACID METABOLISM       | 1.373  | 0.0356    | LN95 shARv7 ETOH |
| WNT BETA CATENIN SIGNALING | 1.443  | 0.0359    | LN95 shARv7 ETOH |
| CHOLESTEROL HOMEOSTASIS    | 1.385  | 0.0403    | LN95 shARv7 ETOH |
| MTORC1 SIGNALING           | 1.286  | 0.0425    | LN95 shARv7 ETOH |
| DNA REPAIR                 | -1.336 | 0.0258    | LN95 shARv7 ETOH |
| MYC TARGETS V1             | 2.112  | 0.0000    | LN95 shARfl ETOH |
| E2F TARGETS                | 1.970  | 0.0000    | LN95 shARfl ETOH |
| G2M CHECKPOINT             | 1.941  | 0.0000    | LN95 shARfl ETOH |
| TGF BETA SIGNALING         | 1.677  | 0.0000    | LN95 shARfl ETOH |
| OXIDATIVE PHOSPHORYLATION  | 1.661  | 0.0000    | LN95 shARfl ETOH |
| MYC TARGETS V2             | 1.777  | 0.0023    | LN95 shARfl ETOH |
| MITOTIC SPINDLE            | 1.278  | 0.0305    | LN95 shARfl ETOH |
| FATTY ACID METABOLISM      | 1.325  | 0.0355    | LN95 shARfl ETOH |
| ANDROGEN RESPONSE          | -1.934 | 0.0000    | LN95 shARfl ETOH |
| UNFOLDED PROTEIN RESPONSE  | -1.666 | 0.0000    | LN95 shARfl ETOH |
| INFLAMMATORY RESPONSE      | -1.594 | 0.0000    | LN95 shARfl ETOH |
| HEME METABOLISM            | -1.478 | 0.0016    | LN95 shARfl ETOH |
| EMT                        | -1.565 | 0.0017    | LN95 shARfl ETOH |
| CHOLESTEROL HOMEOSTASIS    | -1.677 | 0.0017    | LN95 shARfl ETOH |
| TNFA SIGNALING VIA NFKB    | -1.416 | 0.0051    | LN95 shARfl ETOH |
| PROTEIN SECRETION          | -1.563 | 0.0053    | LN95 shARfl ETOH |
| MTORC1 SIGNALING           | -1.377 | 0.0081    | LN95 shARfl ETOH |
| COAGULATION                | -1.497 | 0.0085    | LN95 shARfl ETOH |

|                         |        |        |                  |
|-------------------------|--------|--------|------------------|
| ESTROGEN RESPONSE EARLY | -1.327 | 0.0237 | LN95 shARfl ETOH |
| KRAS SIGNALING UP       | -1.332 | 0.0244 | LN95 shARfl ETOH |
| BILE ACID METABOLISM    | -1.391 | 0.0389 | LN95 shARfl ETOH |

NES: (Normalized Enrichment Scores) the degree to which a given gene set is overrepresented compared to all analyzed gene sets.  
NOM p value: (Nominal p values) the statistical significance of the enrichment score. Pathways highlighted in blue are shared between the shARv7 and shARfl cell lines.

**Table S2 (related to Figure 2C). Detailed statistics of the DHT dose-dependent transcriptional responses in shARv7 or shARfl LNCaP95 cells**

| Set A   |           |              | Set B   |           |              | tHSD               |       | Data subsets |
|---------|-----------|--------------|---------|-----------|--------------|--------------------|-------|--------------|
| Transf. | DHT conc. | mean log2FC  | Transf. | DHT conc. | mean log2FC  | p adj              | sign. |              |
| shARv7  | ETOH      | 0.101015802  | shARv7  | 0.1 nM    | 0.065699762  | <b>0.058050204</b> | n.s.  | All          |
| shARv7  | ETOH      | 0.101015802  | shARv7  | 1 nM      | 0.059176828  | <b>0.008472829</b> | **    | All          |
| shARv7  | ETOH      | 0.101015802  | shARv7  | 10 nM     | 0.052469159  | <b>0.001722733</b> | **    | All          |
| shARv7  | ETOH      | 0.101015802  | shARfl  | ETOH      | -0.024528024 | <b>6.57E-14</b>    | ****  | All          |
| shARv7  | ETOH      | 0.101015802  | shARfl  | 0.1 nM    | -0.050549201 | <b>0</b>           | ****  | All          |
| shARv7  | ETOH      | 0.101015802  | shARfl  | 1 nM      | -0.018436402 | <b>9.19E-14</b>    | ****  | All          |
| shARv7  | ETOH      | 0.101015802  | shARfl  | 10 nM     | -0.06131223  | <b>0</b>           | ****  | All          |
| shARv7  | 0.1 nM    | 0.065699762  | shARv7  | 1 nM      | 0.059176828  | <b>0.998646135</b> | n.s.  | All          |
| shARv7  | 0.1 nM    | 0.065699762  | shARv7  | 10 nM     | 0.052469159  | <b>0.933327401</b> | n.s.  | All          |
| shARv7  | 0.1 nM    | 0.065699762  | shARfl  | ETOH      | -0.024528024 | <b>9.46E-14</b>    | ****  | All          |
| shARv7  | 0.1 nM    | 0.065699762  | shARfl  | 0.1 nM    | -0.050549201 | <b>5.96E-14</b>    | ****  | All          |
| shARv7  | 0.1 nM    | 0.065699762  | shARfl  | 1 nM      | -0.018436402 | <b>1.43E-12</b>    | ****  | All          |
| shARv7  | 0.1 nM    | 0.065699762  | shARfl  | 10 nM     | -0.06131223  | <b>8.20E-14</b>    | ****  | All          |
| shARv7  | 1 nM      | 0.059176828  | shARv7  | 10 nM     | 0.052469159  | <b>0.99869698</b>  | n.s.  | All          |
| shARv7  | 1 nM      | 0.059176828  | shARfl  | ETOH      | -0.024528024 | <b>2.77E-13</b>    | ****  | All          |
| shARv7  | 1 nM      | 0.059176828  | shARfl  | 0.1 nM    | -0.050549201 | <b>9.47E-14</b>    | ****  | All          |
| shARv7  | 1 nM      | 0.059176828  | shARfl  | 1 nM      | -0.018436402 | <b>5.16E-11</b>    | ****  | All          |
| shARv7  | 1 nM      | 0.059176828  | shARfl  | 10 nM     | -0.06131223  | <b>6.21E-14</b>    | ****  | All          |
| shARv7  | 10 nM     | 0.052469159  | shARfl  | ETOH      | -0.024528024 | <b>2.52E-10</b>    | ****  | All          |
| shARv7  | 10 nM     | 0.052469159  | shARfl  | 0.1 nM    | -0.050549201 | <b>9.00E-14</b>    | ****  | All          |
| shARv7  | 10 nM     | 0.052469159  | shARfl  | 1 nM      | -0.018436402 | <b>2.03E-08</b>    | ****  | All          |
| shARv7  | 10 nM     | 0.052469159  | shARfl  | 10 nM     | -0.06131223  | <b>1.01E-13</b>    | ****  | All          |
| shARfl  | ETOH      | -0.024528024 | shARfl  | 0.1 nM    | -0.050549201 | <b>0.405401058</b> | n.s.  | All          |
| shARfl  | ETOH      | -0.024528024 | shARfl  | 1 nM      | -0.018436402 | <b>0.999476191</b> | n.s.  | All          |
| shARfl  | ETOH      | -0.024528024 | shARfl  | 10 nM     | -0.06131223  | <b>0.059440793</b> | n.s.  | All          |
| shARfl  | 0.1 nM    | -0.050549201 | shARfl  | 1 nM      | -0.018436402 | <b>0.168211728</b> | n.s.  | All          |
| shARfl  | 0.1 nM    | -0.050549201 | shARfl  | 10 nM     | -0.06131223  | <b>0.993058836</b> | n.s.  | All          |
| shARfl  | 1 nM      | -0.018436402 | shARfl  | 10 nM     | -0.06131223  | <b>0.015163179</b> | *     | All          |

|        |        |              |        |        |              |             |      |      |
|--------|--------|--------------|--------|--------|--------------|-------------|------|------|
| shARv7 | ETOH   | 0.412119564  | shARv7 | 0.1 nM | 0.450191355  | 2.05737E-05 | **** | Up   |
| shARv7 | ETOH   | 0.412119564  | shARv7 | 1 nM   | 0.409918282  | 0.999991801 | n.s. | Up   |
| shARv7 | ETOH   | 0.412119564  | shARv7 | 10 nM  | 0.393006619  | 0.237353559 | n.s. | Up   |
| shARv7 | ETOH   | 0.412119564  | shARfl | ETOH   | 0.363676569  | 5.71E-08    | **** | Up   |
| shARv7 | ETOH   | 0.412119564  | shARfl | 0.1 nM | 0.490935854  | 8.82608E-09 | **** | Up   |
| shARv7 | ETOH   | 0.412119564  | shARfl | 1 nM   | 0.459979097  | 1.95E-07    | **** | Up   |
| shARv7 | ETOH   | 0.412119564  | shARfl | 10 nM  | 0.645198704  | 8.82601E-09 | **** | Up   |
| shARv7 | 0.1 nM | 0.450191355  | shARv7 | 1 nM   | 0.409918282  | 4.57594E-07 | **** | Up   |
| shARv7 | 0.1 nM | 0.450191355  | shARv7 | 10 nM  | 0.393006619  | 8.82664E-09 | **** | Up   |
| shARv7 | 0.1 nM | 0.450191355  | shARfl | ETOH   | 0.363676569  | 8.83E-09    | **** | Up   |
| shARv7 | 0.1 nM | 0.450191355  | shARfl | 0.1 nM | 0.490935854  | 5.96E-05    | **** | Up   |
| shARv7 | 0.1 nM | 0.450191355  | shARfl | 1 nM   | 0.459979097  | 9.15E-01    | n.s. | Up   |
| shARv7 | 0.1 nM | 0.450191355  | shARfl | 10 nM  | 0.645198704  | 8.83E-09    | **** | Up   |
| shARv7 | 1 nM   | 0.409918282  | shARv7 | 10 nM  | 0.393006619  | 0.300080308 | n.s. | Up   |
| shARv7 | 1 nM   | 0.409918282  | shARfl | ETOH   | 0.363676569  | 2.90E-08    | **** | Up   |
| shARv7 | 1 nM   | 0.409918282  | shARfl | 0.1 nM | 0.490935854  | 8.83E-09    | **** | Up   |
| shARv7 | 1 nM   | 0.409918282  | shARfl | 1 nM   | 0.459979097  | 1.15E-08    | **** | Up   |
| shARv7 | 1 nM   | 0.409918282  | shARfl | 10 nM  | 0.645198704  | 8.83E-09    | **** | Up   |
| shARv7 | 10 nM  | 0.393006619  | shARfl | ETOH   | 0.363676569  | 4.48E-03    | **   | Up   |
| shARv7 | 10 nM  | 0.393006619  | shARfl | 0.1 nM | 0.490935854  | 8.83E-09    | **** | Up   |
| shARv7 | 10 nM  | 0.393006619  | shARfl | 1 nM   | 0.459979097  | 8.83E-09    | **** | Up   |
| shARv7 | 10 nM  | 0.393006619  | shARfl | 10 nM  | 0.645198704  | 8.83E-09    | **** | Up   |
| shARfl | ETOH   | 0.363676569  | shARfl | 0.1 nM | 0.490935854  | 8.82601E-09 | **** | Up   |
| shARfl | ETOH   | 0.363676569  | shARfl | 1 nM   | 0.459979097  | 8.82601E-09 | **** | Up   |
| shARfl | ETOH   | 0.363676569  | shARfl | 10 nM  | 0.645198704  | 8.82601E-09 | **** | Up   |
| shARfl | 0.1 nM | 0.490935854  | shARfl | 1 nM   | 0.459979097  | 0.015520346 | *    | Up   |
| shARfl | 0.1 nM | 0.490935854  | shARfl | 10 nM  | 0.645198704  | 8.82601E-09 | **** | Up   |
| shARfl | 1 nM   | 0.459979097  | shARfl | 10 nM  | 0.645198704  | 8.82601E-09 | **** | Up   |
| shARv7 | ETOH   | -0.391452534 | shARv7 | 0.1 nM | -0.382616663 | 0.972680671 | n.s. | Down |
| shARv7 | ETOH   | -0.391452534 | shARv7 | 1 nM   | -0.338362766 | 2.36307E-08 | **** | Down |
| shARv7 | ETOH   | -0.391452534 | shARv7 | 10 nM  | -0.335184282 | 1.1808E-08  | **** | Down |
| shARv7 | ETOH   | -0.391452534 | shARfl | ETOH   | -0.387748216 | 1.00E+00    | n.s. | Down |
| shARv7 | ETOH   | -0.391452534 | shARfl | 0.1 nM | -0.499942533 | 3.82667E-09 | **** | Down |
| shARv7 | ETOH   | -0.391452534 | shARfl | 1 nM   | -0.445998655 | 1.82E-08    | **** | Down |
| shARv7 | ETOH   | -0.391452534 | shARfl | 10 nM  | -0.648881929 | 3.82667E-09 | **** | Down |
| shARv7 | 0.1 nM | -0.382616663 | shARv7 | 1 nM   | -0.338362766 | 4.78492E-08 | **** | Down |
| shARv7 | 0.1 nM | -0.382616663 | shARv7 | 10 nM  | -0.335184282 | 2.33885E-08 | **** | Down |
| shARv7 | 0.1 nM | -0.382616663 | shARfl | ETOH   | -0.387748216 | 9.97E-01    | n.s. | Down |
| shARv7 | 0.1 nM | -0.382616663 | shARfl | 0.1 nM | -0.499942533 | 3.83E-09    | **** | Down |
| shARv7 | 0.1 nM | -0.382616663 | shARfl | 1 nM   | -0.445998655 | 3.83E-09    | **** | Down |
| shARv7 | 0.1 nM | -0.382616663 | shARfl | 10 nM  | -0.648881929 | 3.83E-09    | **** | Down |
| shARv7 | 1 nM   | -0.338362766 | shARv7 | 10 nM  | -0.335184282 | 0.999894208 | n.s. | Down |
| shARv7 | 1 nM   | -0.338362766 | shARfl | ETOH   | -0.387748216 | 4.15E-09    | **** | Down |
| shARv7 | 1 nM   | -0.338362766 | shARfl | 0.1 nM | -0.499942533 | 3.83E-09    | **** | Down |
| shARv7 | 1 nM   | -0.338362766 | shARfl | 1 nM   | -0.445998655 | 3.83E-09    | **** | Down |
| shARv7 | 1 nM   | -0.338362766 | shARfl | 10 nM  | -0.648881929 | 3.83E-09    | **** | Down |
| shARv7 | 10 nM  | -0.335184282 | shARfl | ETOH   | -0.387748216 | 4.00E-09    | **** | Down |
| shARv7 | 10 nM  | -0.335184282 | shARfl | 0.1 nM | -0.499942533 | 3.83E-09    | **** | Down |

|        |        |              |        |        |              |                    |      |      |
|--------|--------|--------------|--------|--------|--------------|--------------------|------|------|
| shARv7 | 10 nM  | -0.335184282 | shARfl | 1 nM   | -0.445998655 | <b>3.83E-09</b>    | **** | Down |
| shARv7 | 10 nM  | -0.335184282 | shARfl | 10 nM  | -0.648881929 | <b>3.83E-09</b>    | **** | Down |
| shARfl | ETOH   | -0.387748216 | shARfl | 0.1 nM | -0.499942533 | <b>3.82667E-09</b> | **** | Down |
| shARfl | ETOH   | -0.387748216 | shARfl | 1 nM   | -0.445998655 | <b>3.82692E-09</b> | **** | Down |
| shARfl | ETOH   | -0.387748216 | shARfl | 10 nM  | -0.648881929 | <b>3.82667E-09</b> | **** | Down |
| shARfl | 0.1 nM | -0.499942533 | shARfl | 1 nM   | -0.445998655 | <b>4.53458E-09</b> | **** | Down |
| shARfl | 0.1 nM | -0.499942533 | shARfl | 10 nM  | -0.648881929 | <b>3.82667E-09</b> | **** | Down |
| shARfl | 1 nM   | -0.445998655 | shARfl | 10 nM  | -0.648881929 | <b>3.82667E-09</b> | **** | Down |

Set A and Set B: Values used for ANOVA. tHSD: Tukey's honest significance test. Transf.: Transfection of the cell line. DHT conc.: DHT concentration in which the cells were grown. Mean log2FC: Averages of logarithm to the base 2 of the fold changes for the cell lines relative to control (shGFP). P adj: adjusted p values for the tHSD. Sign: Significance of the adjusted p values. Data subsets: Indication which data points were used in the analyses. All: Using all differentially expressed genes (adj p < 0.05). Up: Using up regulated differentially expressed genes (log2FC > 0, adj p < 0.05). Down: Using down regulated differentially expressed genes (log2FC < 0, adj p < 0.05).

**A**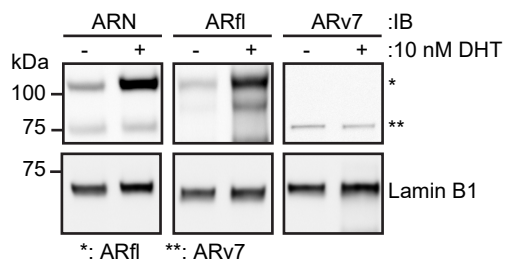**B**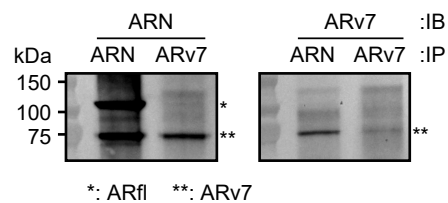**C**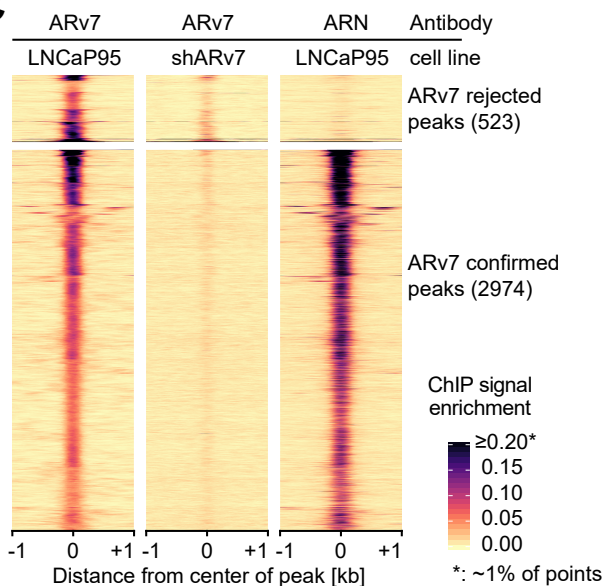**D**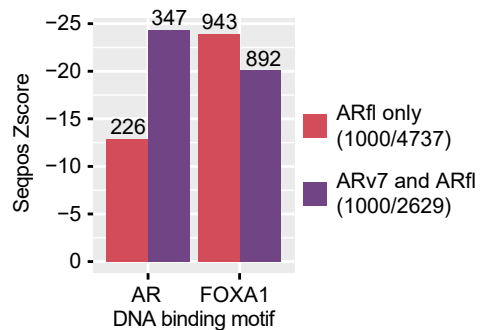**E**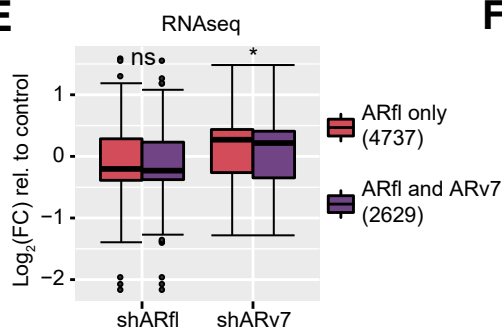**F**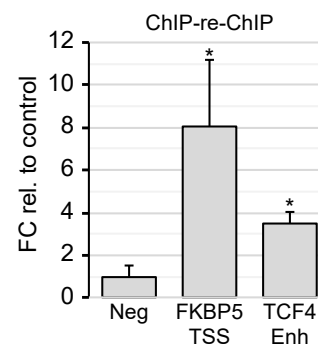**G**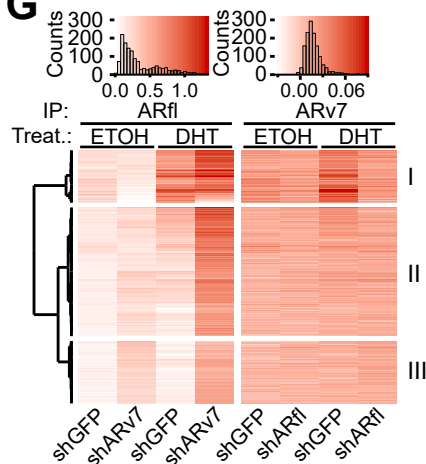**H**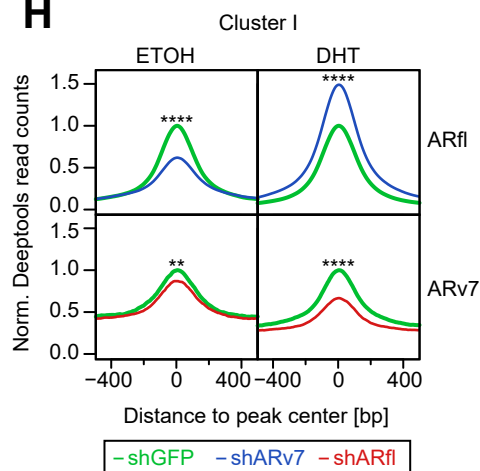**I**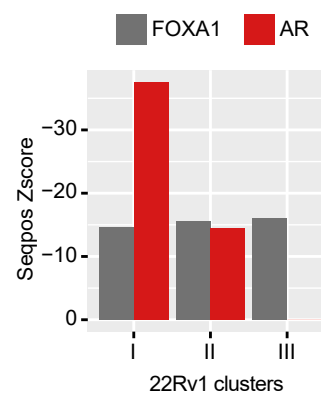

**Figure S3 (related to Figure 3). ARv7 and ARfl ChIP-seq in LNCaP95 and 22Rv1 and AR isoform-specific fluorescence recovery after photobleaching (FRAP) microscopy**

**A.** Western blot of nuclear lysates of LNCaP95 cells treated with vehicle (-) or 10 nM DHT (+) for 4 h. AR levels were detected (and specificity of the antibody confirmed) using ARN, ARfl or ARv7 antibodies. Equal protein loading was confirmed by probing with Lamin B1. **B.** Western blot of AR N-terminus (ARN) or ARv7 co-IPs, using formaldehyde cross-linked and sonicated lysates from LNCaP95 cells, in the absence of hormone. Blots were probed (IB) with either ARN or ARv7 antibodies, as indicated. **C.** Heatmap of ARv7 or ARN ChIP-seq signals centered at ARv7 peaks in LNCaP95 parental or shARv7 cell lines, as indicated. Each ChIP-seq dataset was normalized separately. ARv7 peak signals are hierarchically clustered by Euclidian distance and ward functions in R. 523 ARv7 peaks clustered separately. These peaks were defined as “ARv7 rejected peaks” and were removed from further downstream analyses, because they did not show signals in an additional N-terminal AR-specific cistrome, and did not show a reduction of signal with shARv7. **D.** Comparison of DNA binding motifs of ARfl-only (n=4737) and ARv7-ARfl-shared ChIP-seq peaks (n=2629) peaks, as defined in Figure 3B. Peaks were randomly subsampled for this analysis to 1000 each. The height of the bars represents the Zscore from SeqPos which is proportional to the p value of the motif, as well as its position within the peaks. The numbers indicate the number of times the motif was found within the 1000 peaks; multiple hits per peak are possible. **E.** Expression of significantly dysregulated genes (adj.  $p < 0.05$ ) associated with ChIP-seq peaks as defined in D (50 kb interval around the transcription start site). The boxplots show mRNA fold changes (FC) after knock-down of either ARfl (shARfl) or ARv7 (shARv7) relative to control (shGFP). P values between groups were calculated using the Kruskal-Wallis H test. Boxplots show the median, the 1st and 3rd quartile. Whiskers extend to 1.5 the interquartile range and data beyond that is shown as individual points. **F.** ARfl-ARv7 ChIP-re-ChIP for select binding sites (as indicated) in LNCaP95 cells in the absence of DHT. Cells were first ChIPed with an ARfl-specific antibody (AR C19) and then re-ChIPed with either IgG (control) or an ARv7 antibody. Results are normalized to the negative control locus (Neg) and expressed as a fold change (FC) of the ARv7 re-ChIP over the IgG re-ChIP. P values were calculated relative to control (Neg) using standard t-test; \*:  $p \leq 0.05$  **G.** Heatmap of ARfl and ARv7 ChIP-seq in indicated 22Rv1 cell lines treated for 4 hr with 10 nM DHT (DHT) or vehicle (ETOH). The heatmap shows the signal intensities of the 10000 most variable peaks of the ETOH-treated ChIP-seq experiments, which were then clustered on the ARfl signals using Pearson correlation. **H.** ChIP-seq signal profiles for the peaks in cluster I from G. P values were calculated using standard t-test; \*\*:  $p \leq 0.01$ ; \*\*\*\*:  $p \leq 0.0001$ . **I.** Comparison of DNA binding motifs of peaks defined in G. Peaks were randomly subsampled to 1000 each. The height of the bars represents the Zscore from SeqPos, which is proportional to the p value of the motif as well as its position within the peaks.

**Table S3 (related to Figure 3) Gene Ontology Hallmark gene sets associated with ARfl only and ARfl/ARv7 shared peaks.**

| Examined gene set          | Gene Set Name                    | # Genes in Gene Set (K) | Description                                                                                    | # Genes in Overlap (k) | k/K    | p value  | FDR q value |
|----------------------------|----------------------------------|-------------------------|------------------------------------------------------------------------------------------------|------------------------|--------|----------|-------------|
| ARfl only (4737 peaks)     | HALLMARK ANDROGEN RESPONSE       | 101                     | Genes defining response to androgens.                                                          | 32                     | 0.3168 | 3.39E-18 | 1.69E-16    |
| ARfl only (4737 peaks)     | HALLMARK XENOBIOTIC METABOLISM   | 200                     | Genes encoding proteins involved in processing of drugs and other xenobiotics.                 | 41                     | 0.205  | 2.10E-15 | 5.25E-14    |
| ARfl only (4737 peaks)     | HALLMARK IL2 STAT5 SIGNALING     | 200                     | Genes up-regulated by STAT5 in response to IL2 stimulation.                                    | 40                     | 0.2    | 1.10E-14 | 1.83E-13    |
| ARfl only (4737 peaks)     | HALLMARK TNFA SIGNALING VIA NFKB | 200                     | Genes regulated by NF-kB in response to TNF [GeneID=7124].                                     | 37                     | 0.185  | 1.31E-12 | 1.63E-11    |
| ARfl only (4737 peaks)     | HALLMARK G2M CHECKPOINT          | 200                     | Genes involved in the G2/M checkpoint, as in progression through the cell division cycle.      | 35                     | 0.175  | 2.68E-11 | 2.68E-10    |
| ARfl only (4737 peaks)     | HALLMARK FATTY ACID METABOLISM   | 158                     | Genes encoding proteins involved in metabolism of fatty acids.                                 | 30                     | 0.1899 | 8.61E-11 | 7.18E-10    |
| ARfl only (4737 peaks)     | HALLMARK ESTROGEN RESPONSE EARLY | 200                     | Genes defining early response to estrogen.                                                     | 33                     | 0.165  | 4.81E-10 | 2.73E-09    |
| ARfl only (4737 peaks)     | HALLMARK MTORC1 SIGNALING        | 200                     | Genes up-regulated through activation of mTORC1 complex.                                       | 33                     | 0.165  | 4.81E-10 | 2.73E-09    |
| ARfl only (4737 peaks)     | HALLMARK BILE ACID METABOLISM    | 112                     | Genes involve in metabolism of bile acids and salts.                                           | 24                     | 0.2143 | 4.91E-10 | 2.73E-09    |
| ARfl only (4737 peaks)     | HALLMARK UV RESPONSE DN          | 144                     | Genes down-regulated in response to ultraviolet (UV) radiation.                                | 27                     | 0.1875 | 9.91E-10 | 4.95E-09    |
| ARfl only (4737 peaks)     | HALLMARK COAGULATION             | 138                     | Genes encoding components of blood coagulation system; also up-regulated in platelets.         | 26                     | 0.1884 | 1.80E-09 | 7.42E-09    |
| ARfl only (4737 peaks)     | HALLMARK ESTROGEN RESPONSE LATE  | 200                     | Genes defining late response to estrogen.                                                      | 32                     | 0.16   | 1.93E-09 | 7.42E-09    |
| ARfl only (4737 peaks)     | HALLMARK HYPOXIA                 | 200                     | Genes up-regulated in response to low oxygen levels (hypoxia).                                 | 32                     | 0.16   | 1.93E-09 | 7.42E-09    |
| ARfl only (4737 peaks)     | HALLMARK P53 PATHWAY             | 200                     | Genes involved in p53 pathways and networks.                                                   | 31                     | 0.155  | 7.47E-09 | 2.67E-08    |
| ARfl only (4737 peaks)     | HALLMARK PEROXISOME              | 104                     | Genes encoding components of peroxisome.                                                       | 21                     | 0.2019 | 1.79E-08 | 5.96E-08    |
| ARfl only (4737 peaks)     | HALLMARK GLYCOLYSIS              | 200                     | Genes encoding proteins involved in glycolysis and gluconeogenesis.                            | 30                     | 0.15   | 2.79E-08 | 8.20E-08    |
| ARfl only (4737 peaks)     | HALLMARK INFLAMMATORY RESPONSE   | 200                     | Genes defining inflammatory response.                                                          | 30                     | 0.15   | 2.79E-08 | 8.20E-08    |
| ARfl only (4737 peaks)     | HALLMARK ADIPOGENESIS            | 200                     | Genes up-regulated during adipocyte differentiation (adipogenesis).                            | 28                     | 0.14   | 3.45E-07 | 9.60E-07    |
| ARfl only (4737 peaks)     | HALLMARK COMPLEMENT              | 200                     | Genes encoding components of the complement system, which is part of the innate immune system. | 27                     | 0.135  | 1.15E-06 | 2.87E-06    |
| ARfl only (4737 peaks)     | HALLMARK KRAS SIGNALING UP       | 200                     | Genes up-regulated by KRAS activation.                                                         | 27                     | 0.135  | 1.15E-06 | 2.87E-06    |
| ARfl and ARv7 (2629 peaks) | HALLMARK ANDROGEN RESPONSE       | 101                     | Genes defining response to androgens.                                                          | 25                     | 0.2475 | 2.11E-17 | 1.06E-15    |
| ARfl and ARv7 (2629 peaks) | HALLMARK TNFA SIGNALING VIA NFKB | 200                     | Genes regulated by NF-kB in response to TNF [GeneID=7124].                                     | 28                     | 0.14   | 1.23E-12 | 3.07E-11    |
| ARfl and ARv7 (2629 peaks) | HALLMARK G2M CHECKPOINT          | 200                     | Genes involved in the G2/M checkpoint, as in progression through the cell division cycle.      | 23                     | 0.115  | 6.16E-09 | 1.03E-07    |

|                               |                                                     |     |                                                                                                                               |    |        |          |          |
|-------------------------------|-----------------------------------------------------|-----|-------------------------------------------------------------------------------------------------------------------------------|----|--------|----------|----------|
| ARfI and ARv7<br>(2629 peaks) | HALLMARK MITOTIC<br>SPINDLE                         | 200 | Genes important for mitotic<br>spindle assembly.                                                                              | 22 | 0.11   | 2.95E-08 | 2.95E-07 |
| ARfI and ARv7<br>(2629 peaks) | HALLMARK<br>XENOBIOTIC<br>METABOLISM                | 200 | Genes encoding proteins involved<br>in processing of drugs and other<br>xenobiotics.                                          | 22 | 0.11   | 2.95E-08 | 2.95E-07 |
| ARfI and ARv7<br>(2629 peaks) | HALLMARK<br>ADIPOGENESIS                            | 200 | Genes up-regulated during<br>adipocyte differentiation<br>(adipogenesis).                                                     | 21 | 0.105  | 1.34E-07 | 9.60E-07 |
| ARfI and ARv7<br>(2629 peaks) | HALLMARK KRAS<br>SIGNALING UP                       | 200 | Genes up-regulated by KRAS<br>activation.                                                                                     | 21 | 0.105  | 1.34E-07 | 9.60E-07 |
| ARfI and ARv7<br>(2629 peaks) | HALLMARK IL2<br>STAT5 SIGNALING                     | 200 | Genes up-regulated by STAT5 in<br>response to IL2 stimulation.                                                                | 20 | 0.1    | 5.82E-07 | 3.64E-06 |
| ARfI and ARv7<br>(2629 peaks) | HALLMARK HEME<br>METABOLISM                         | 200 | Genes involved in metabolism of<br>heme (a cofactor consisting of<br>iron and porphyrin) and<br>erythroblast differentiation. | 19 | 0.095  | 2.39E-06 | 1.33E-05 |
| ARfI and ARv7<br>(2629 peaks) | HALLMARK<br>SPERMATOGENESIS                         | 135 | Genes up-regulated during<br>production of male gametes<br>(sperm), as in spermatogenesis.                                    | 15 | 0.1111 | 4.00E-06 | 2.00E-05 |
| ARfI and ARv7<br>(2629 peaks) | HALLMARK<br>INFLAMMATORY<br>RESPONSE                | 200 | Genes defining inflammatory<br>response.                                                                                      | 18 | 0.09   | 9.26E-06 | 4.21E-05 |
| ARfI and ARv7<br>(2629 peaks) | HALLMARK<br>CHOLESTEROL<br>HOMEOSTASIS              | 74  | Genes involved in cholesterol<br>homeostasis.                                                                                 | 10 | 0.1351 | 2.94E-05 | 1.21E-04 |
| ARfI and ARv7<br>(2629 peaks) | HALLMARK HYPOXIA                                    | 200 | Genes up-regulated in response<br>to low oxygen levels (hypoxia).                                                             | 17 | 0.085  | 3.39E-05 | 1.21E-04 |
| ARfI and ARv7<br>(2629 peaks) | HALLMARK<br>OXIDATIVE<br>PHOSPHORYLATION            | 200 | Genes encoding proteins involved<br>in oxidative phosphorylation.                                                             | 17 | 0.085  | 3.39E-05 | 1.21E-04 |
| ARfI and ARv7<br>(2629 peaks) | HALLMARK APICAL<br>JUNCTION                         | 200 | Genes encoding components of<br>apical junction complex.                                                                      | 16 | 0.08   | 1.17E-04 | 3.24E-04 |
| ARfI and ARv7<br>(2629 peaks) | HALLMARK E2F<br>TARGETS                             | 200 | Genes encoding cell cycle related<br>targets of E2F transcription<br>factors.                                                 | 16 | 0.08   | 1.17E-04 | 3.24E-04 |
| ARfI and ARv7<br>(2629 peaks) | HALLMARK<br>GLYCOLYSIS                              | 200 | Genes encoding proteins involved<br>in glycolysis and<br>gluconeogenesis.                                                     | 16 | 0.08   | 1.17E-04 | 3.24E-04 |
| ARfI and ARv7<br>(2629 peaks) | HALLMARK MTORC1<br>SIGNALING                        | 200 | Genes up-regulated through<br>activation of mTORC1 complex.                                                                   | 16 | 0.08   | 1.17E-04 | 3.24E-04 |
| ARfI and ARv7<br>(2629 peaks) | HALLMARK FATTY<br>ACID METABOLISM                   | 158 | Genes encoding proteins involved<br>in metabolism of fatty acids.                                                             | 13 | 0.0823 | 3.77E-04 | 8.99E-04 |
| ARfI and ARv7<br>(2629 peaks) | HALLMARK<br>EPITHELIAL<br>MESENCHYMAL<br>TRANSITION | 200 | Genes defining epithelial-<br>mesenchymal transition, as in<br>wound healing, fibrosis and<br>metastasis.                     | 15 | 0.075  | 3.77E-04 | 8.99E-04 |

Pathways highlighted in blue are with the top 20 enriched pathways for both the genes associated with the ARfI only and the ARfI and ARv7 peaks.

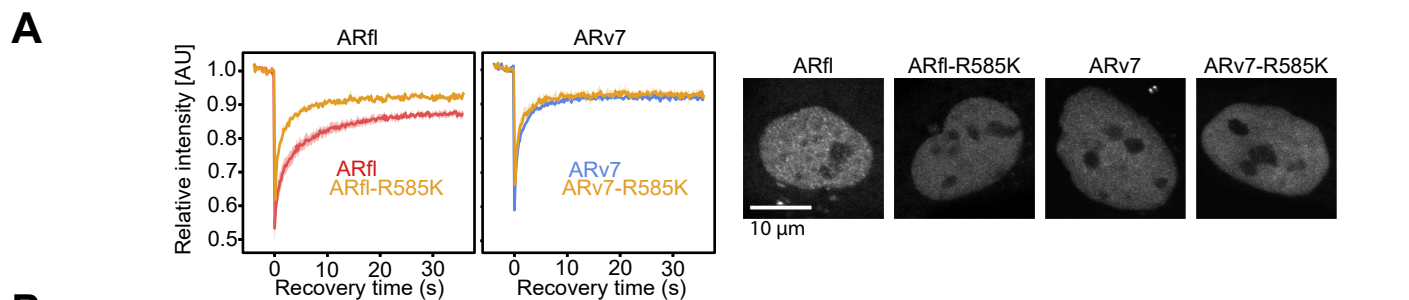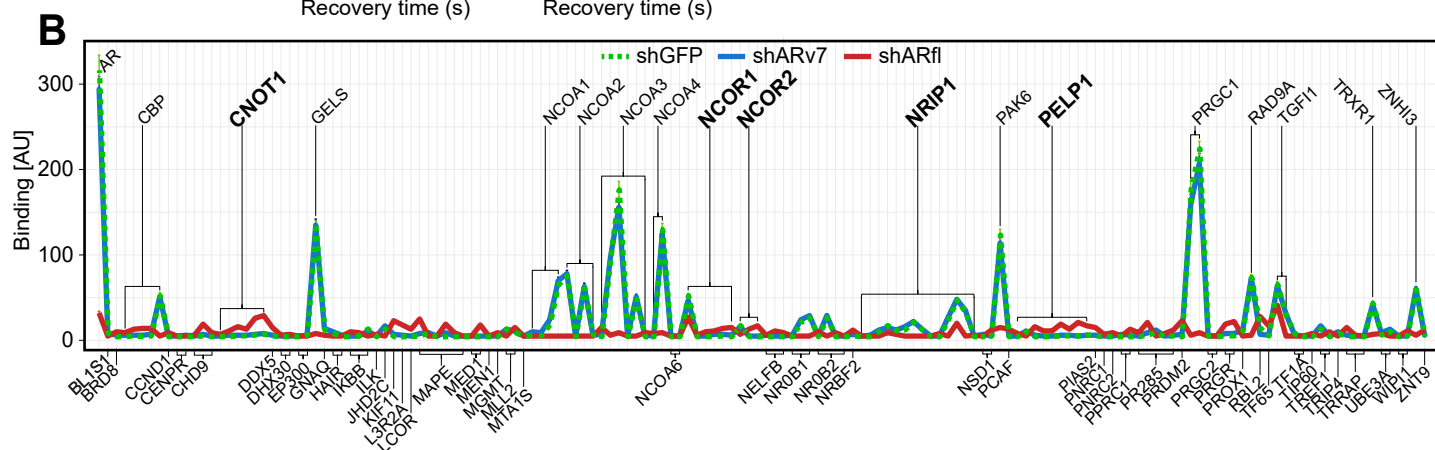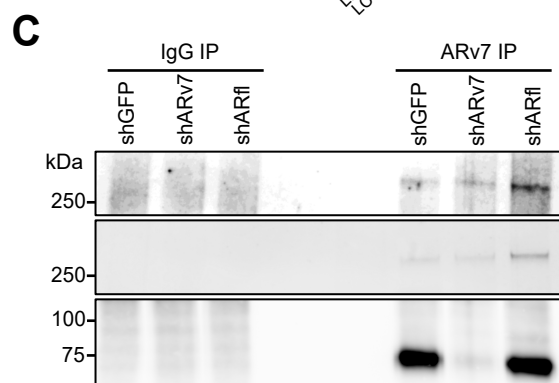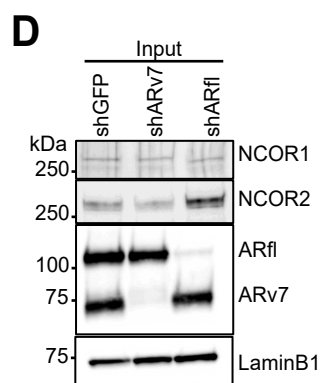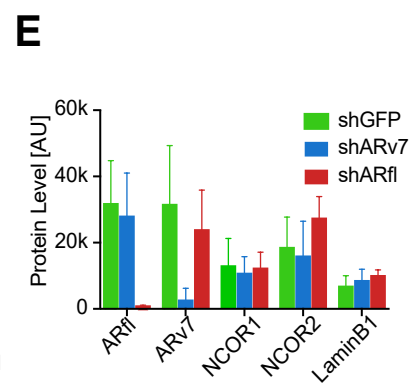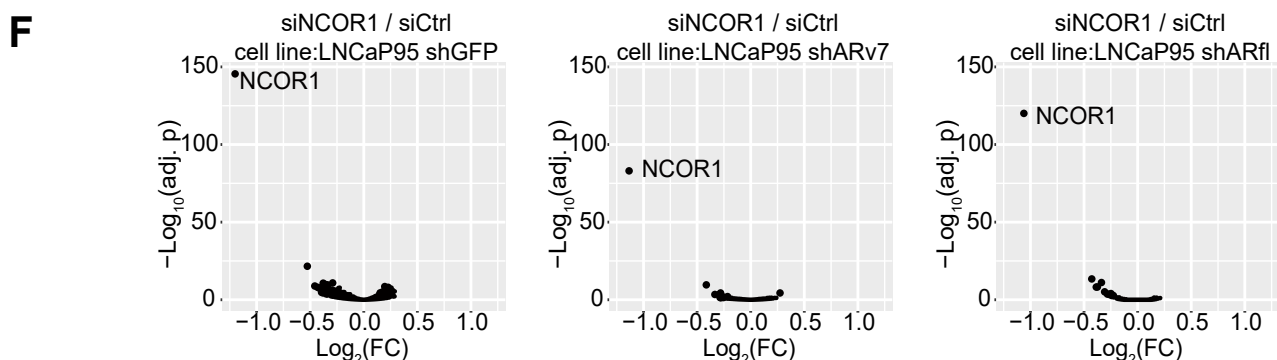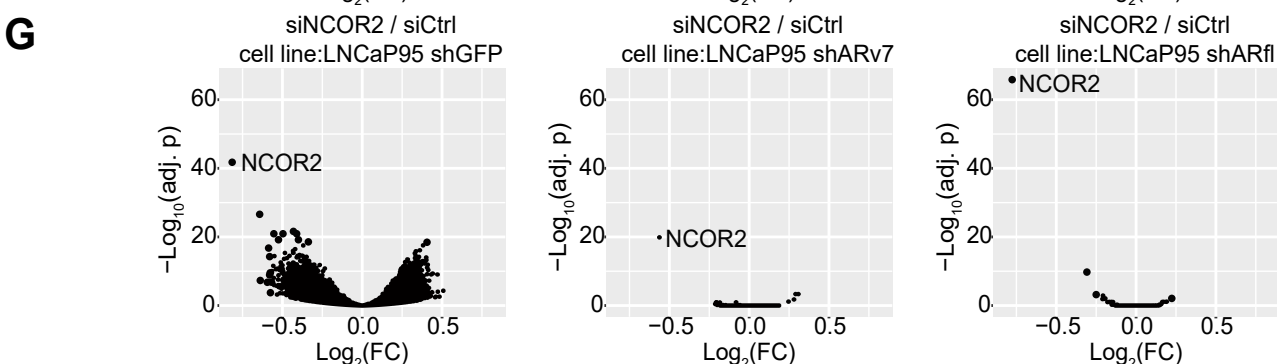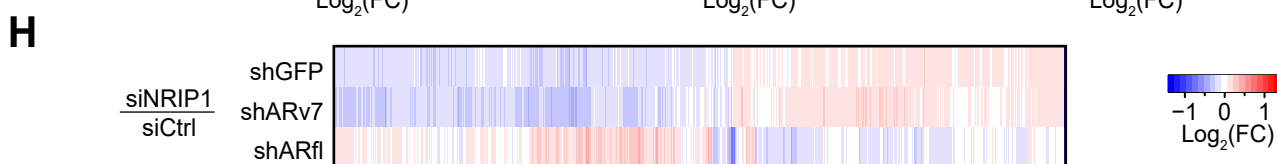

#### **Figure S4 (related to Figure 4). ARv7 and ARfl coregulator interaction assays**

**A.** Line plots (*left*) and representative images (*right*) of FRAP microscopy of wild-type ARfl or ARv7 and their respective DNA-binding mutants (R585K). Results are the mean of 33-47 cells  $\pm$  SEM and are shown in arbitrary units (AU). Image scale bar is 10  $\mu$ m. **B.** MARCoNI peptide binding array of cell lysates from shGFP (dotted green), shARv7 (solid blue) and shARfl cells (solid red) grown in the presence of dox for 3 days and induced with 10 nM DHT for 30 min. Peptide binding for AR was assessed with a pan-AR antibody, and mean binding ( $\pm$  SEM), displayed as arbitrary binding units (AU) of triplicate experiments, is shown. Statistically significant interactions with classical corepressors are highlighted in bold. **C.** Representative example of the co-immunoprecipitation (co-IP) of ARv7 with selected co-repressors (NCOR1 and NCOR2) using nuclear lysates of shGFP, shARv7 and shARfl LNCaP95 cells grown in the absence of hormone (used in Figure 4B). **D.** Representative example of Input samples (1/25th of the IP samples) for co-IPs from B. before IP with IgG or ARv7. **E.** Quantification of all Input samples in arbitrary units (AU). **F, G.** Volcano plots for the experiments depicted in Figure 4C. Expression fold changes (FC) and adjusted p values (adj. p) after siRNA-mediated knock-down of NCOR1 (siNCOR1, F) and siNCOR2 (siNCOR2, G) relative to a si control (siCtrl) are shown in LNCaP95 cells with additional depletion of either ARv7 (shARv7), ARfl (shARfl) or a control (shGFP). **H.** Heatmap of genes significantly (adj.p < 0.05) dysregulated upon siRNA-mediated silencing of NRIP1 (siNRIP1) in LNCaP95 cell lines with an additional knock down of either ARv7 (shARv7), ARfl (shARfl) or a control (shGFP). The analysis was performed together with the one in Figure 4C. The heatmap shows the log<sub>2</sub> fold changes of the dysregulated genes for the indicated siRNA-treatments relative to a si control in each row.

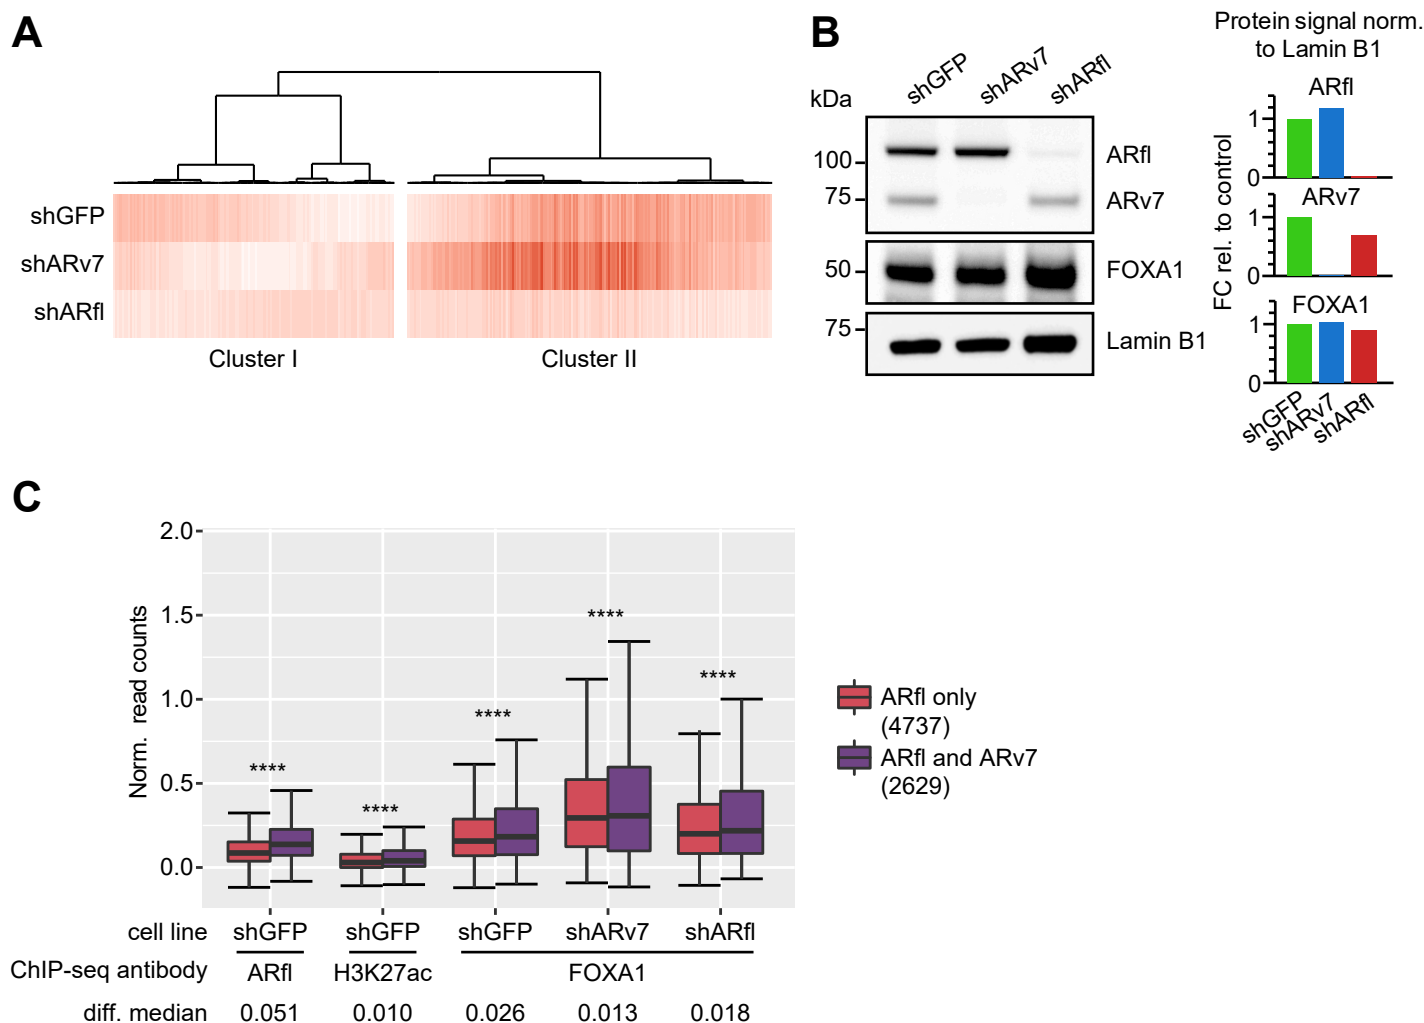

**Figure S5 (related to Figure 5). Clustering of ChIP-seq peaks and FOXA1 protein levels in ARfl and ARv7 knockdown cells**

**A.** Hierarchical clustering of the normalized read-counts from H3K27ac ChIP-seq, for the ARv7 and ARfl peaks defined in Figure 3B. The clustering is used in Figures 5A-5F. **B. Left:** Western blot of nuclear lysates of dox-inducible shGFP, shARv7 and shARfl cells, grown with dox for 3 days. Proteins were detected with indicated antibodies. Lamin B1 serves as a loading control. **Right:** Quantification of Western Blot signals. Signals of the ARfl-, ARv7- and FOXA1 antibodies were normalized to their Lamin B1 values and expressed as a fold change (FC) relative to shGFP. **C.** ARfl, H3K27ac and FOXA1 ChIP-seq signals in indicated LNCaP95 cell lines (shGFP, shARfl and shARv7) at ARfl only (n=4737) and at ARfl/ARv7 shared peaks (n=2629), as defined in Figure 3B. The difference in the medians between ARfl/ARv7 shared and ARfl only peaks is indicated. Boxplots show the median, the 1st and 3rd quartile. Whiskers extend to 1.5 the interquartile range. P values were calculated using standard t-test; \*\*\*\*:  $p \leq 0.0001$ .

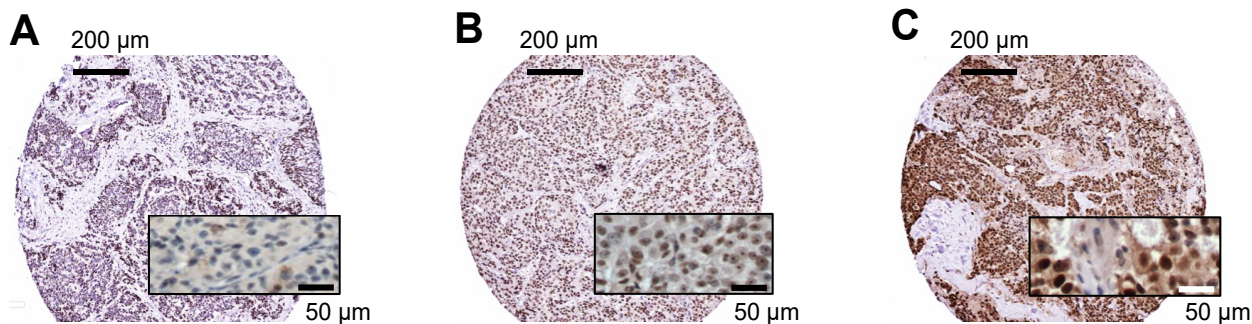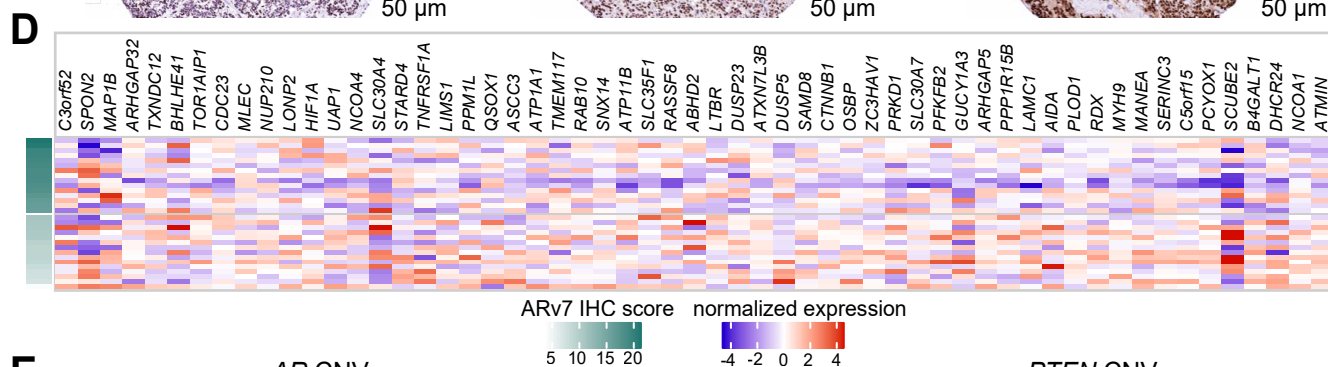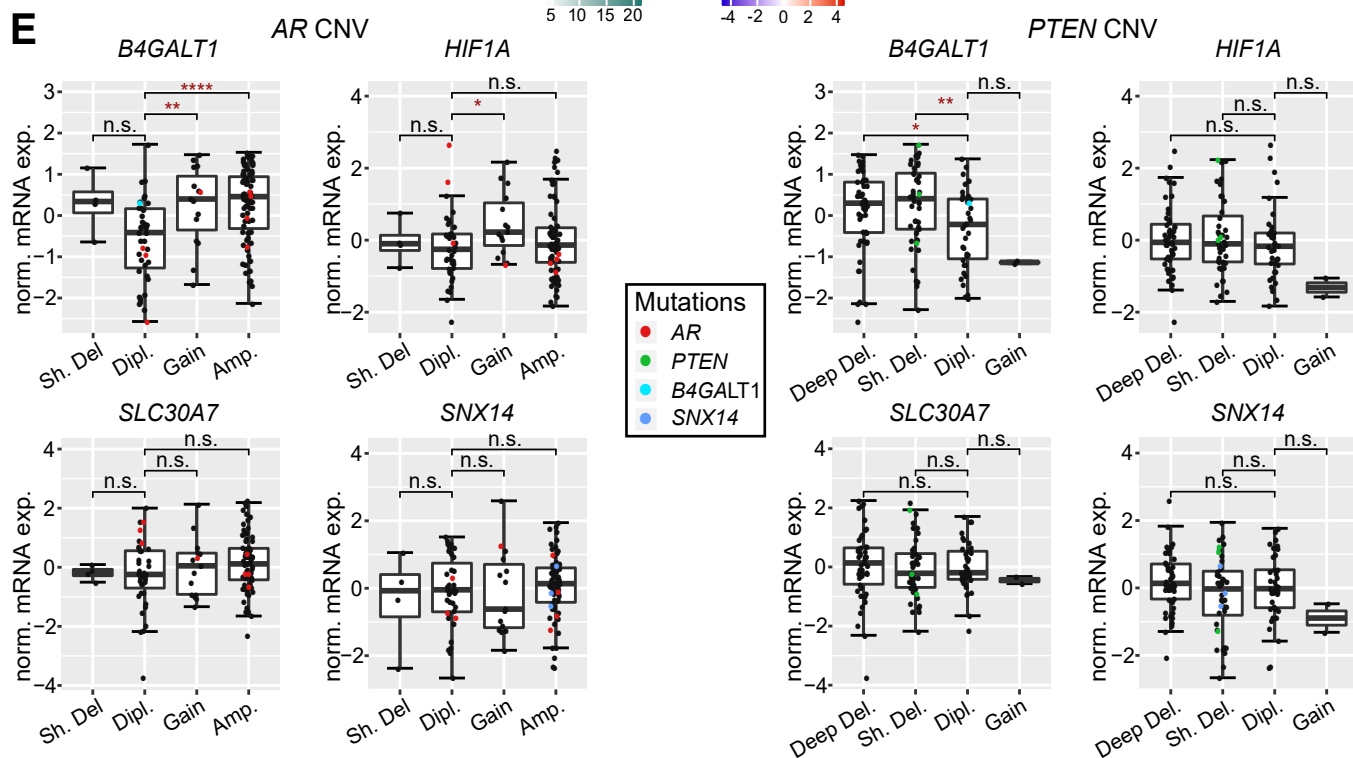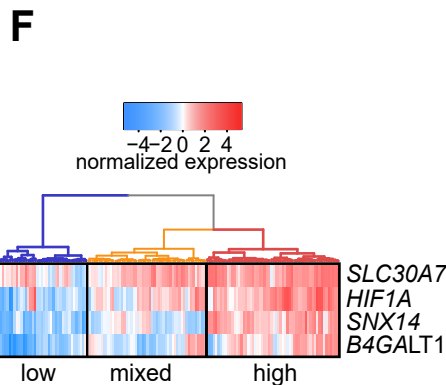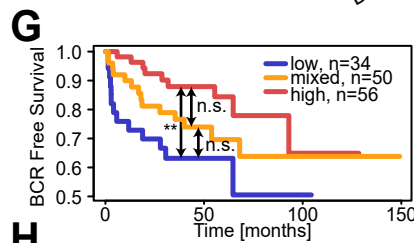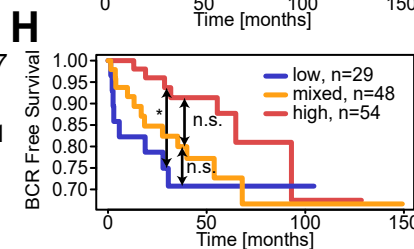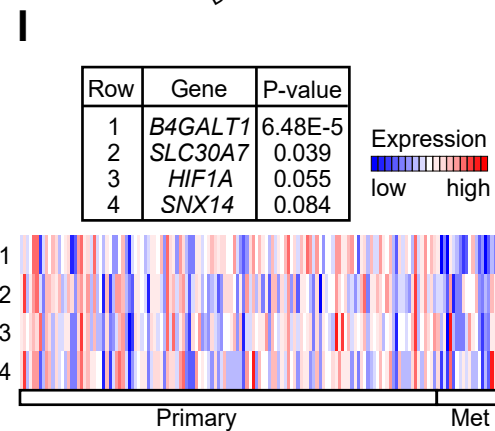

**Figure S6 (related to Figure 6). IHC controls for the ARv7-specific antibody and expression levels of ARv7-repressed target genes that inhibit CRPC growth**

**A-C.** Representative staining and scores (average nuclear optical density multiplied with the fraction of positive nuclei) from PCa spots on TMA 55, stained with an ARv7-specific antibody. A. low ARv7, score: 4; B. medium ARv7, score: 14; C. high ARv7, score: 24. **D.** Heatmap of leading edge gene expression levels in patient samples, as determined by GSEA (see Figure 6B). Patients were selected according to the lowest (low ARv7 expression) and highest quartiles (high ARv7 expression) of ARv7 IHC scores. **E.** Expression of *B4GALT1*, *HIF1A*, *SLC30A7* and *SNX14* in patients with known *AR* (left) and *PTEN* (right) copy number variations (CNV). Patients were grouped by cBioportal (Cerami et al., 2012) into deep deletions potentially missing both copies (Deep Del), shallow deletion potentially missing one copy (Sh. Del.), diploid having two copies (Dipl.) gain indicating a low level amplification (Gain) and amplification indicating a high level amplification (Amp.). Samples with *AR* (red), *PTEN* (green), *B4GALT1* (azure) or *SNX14* mutations (blue) are color-coded. No mutations were detected for *SLC30A7* or *HIF1A*. Boxplots show the median, the 1st and 3rd quartile. Whiskers extend to 1.5 the interquartile range. P values were calculated using Wilcoxon test; n.s.; not significant  $p > 0.05$ ; \*:  $p \leq 0.05$ ; \*\*:  $p \leq 0.01$ ; \*\*\*\*:  $p \leq 0.0001$ . **F.** Hierarchical clustering of the 4 ARv7-regulated, positively-selected target genes from Figure 6D, and gene expression data from patient samples (Taylor et al., 2010). Three clusters, low (blue), mixed (orange) and high (red), based on the average expression of the 4 genes, are shown. **G, H.** Kaplan-Meier graphs of PSA recurrence-free survival (BCR Free Survival) for the three patient clusters defined in F. Data for either primary or metastatic samples (G), or primary samples only are shown (H). P values were determined using the log rank test; ns: not significant; \*:  $p < 0.05$ ; \*\*:  $p < 0.01$ . **I.** Heatmap of gene expression levels of the ARv7-repressed target genes *B4GALT1*, *SLC30A7*, *HIF1A*, and *SNX14* in primary compared to metastatic PCa in the Taylor dataset (Taylor et al., 2010).
